# Supplementary material for: Utilization of newly configured carbazole-cyanopyridone structural hybrids towards achieving high-performance cyan fluorescent organic light-emitting diodes
Source: Royal Society of Chemistry journal article supplement (doi:10.1039/d3ma00922j), 2024-01-01
Supplement: d3ma00922j1.pdf [file d3ma00922j1.pdf]

## Utilization of Newly Configured Carbazole-Cyanopyridone Structural Hybrids towards Achieving High-Performance Cyan Fluorescent Organic Light-Emitting Diodes

Vishrutha K S,<sup>a</sup> Hidayath Ulla,<sup>b</sup> Raveendra Kiran M,<sup>c</sup> Badekai Ramachandra Bhat,<sup>a,\*</sup>  
and Airody Vasudeva Adhikari<sup>a,d\*</sup>

<sup>a</sup>Organic Materials Laboratory, Department of Chemistry, National Institute of Technology Karnataka, Surathkal, Mangalore - 575025, India.

<sup>b</sup>Department of Physics, Presidency University, Bangalore - 560064, Karnataka, India.

<sup>c</sup>Department of Physics, Vignan's Institute of Information Technology, Visakhapatnam - 530049, India.

<sup>d</sup>Yenepoya Research Centre, Yenepoya Deemed to be University, Deralakatte, Mangalore - 575 018, India.

\*Corresponding author's e-mail: [ram@nitk.edu.in](mailto:ram@nitk.edu.in) (B.R.B.), [avachem@gmail.com](mailto:avachem@gmail.com) (A.V.A.)

### Table of contents

| SL No. | Contents                                                                                                                                                         | Page No.                         |
|--------|------------------------------------------------------------------------------------------------------------------------------------------------------------------|----------------------------------|
| 1      | FTIR spectral characterization<br><sup>1</sup> HNMR spectral characterization<br><sup>13</sup> C NMR spectral characterization<br>Mass spectral characterization | 02-05<br>05-08<br>09-12<br>12-15 |
| 2      | Cyclic voltammograms                                                                                                                                             | 16                               |
| 3      | Solvatochromic behavior                                                                                                                                          | 17-19                            |
| 4      | Lippert-Mataga graphs                                                                                                                                            | 19-20                            |

## 1. FTIR spectral characterization

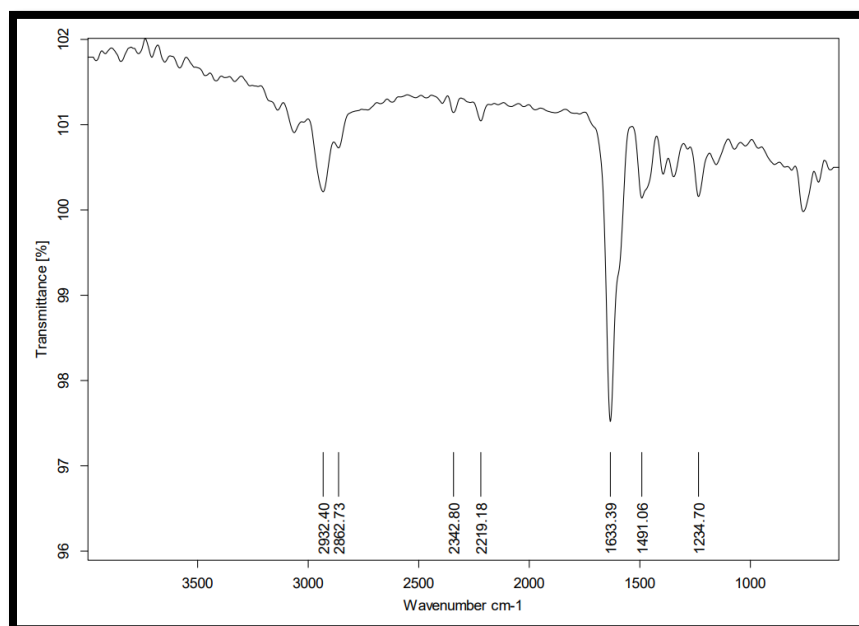

**Figure S1.** FTIR spectrum of Cz-CyP<sub>1</sub>

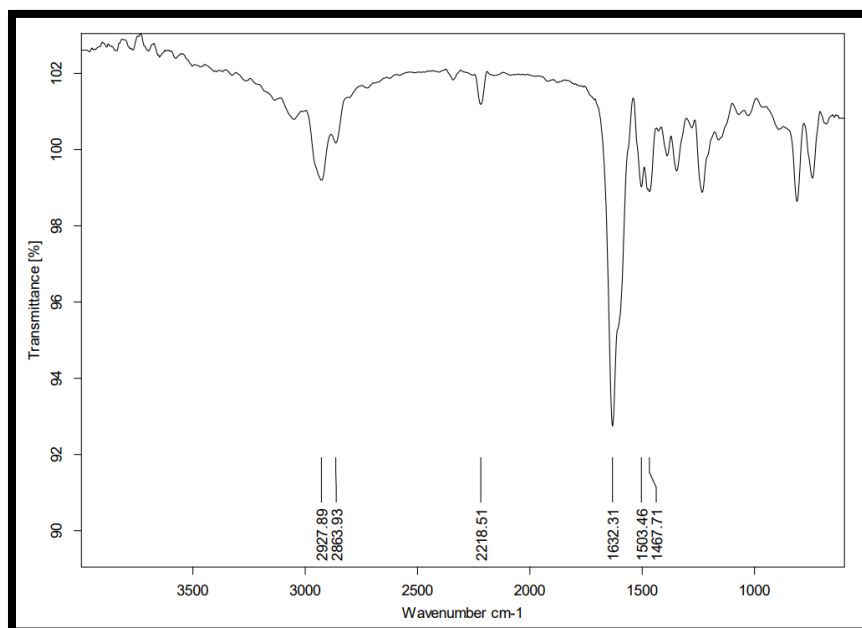

**Figure S2.** FTIR spectrum of Cz-CyP<sub>2</sub>

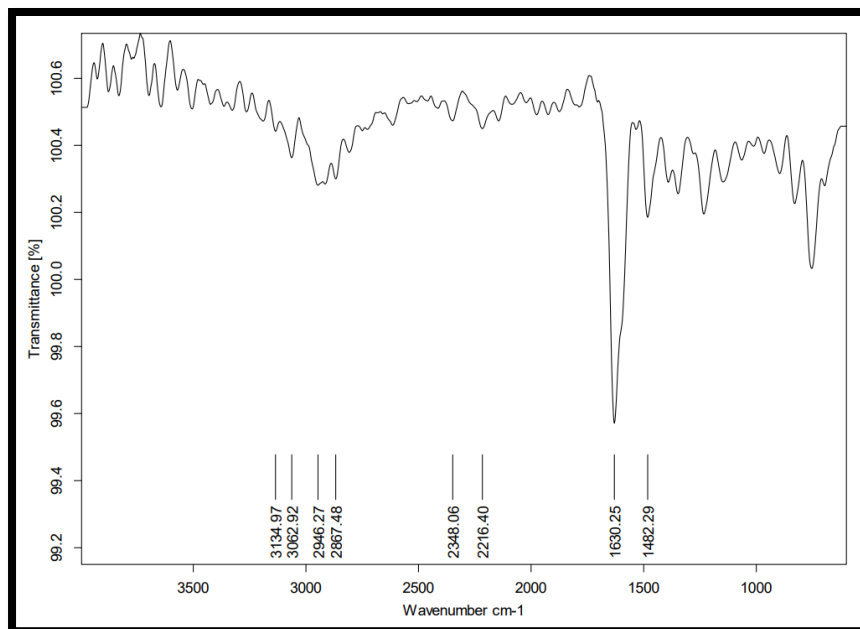

**Figure S3.** FTIR spectrum of Cz-CyP<sub>3</sub>

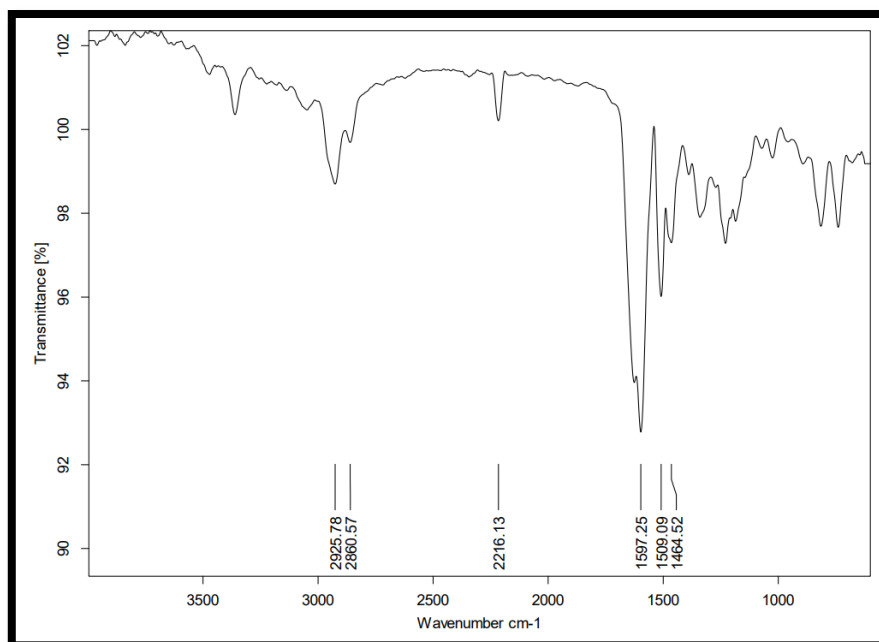

**Figure S4.** FTIR spectrum of Cz-CyP<sub>4</sub>

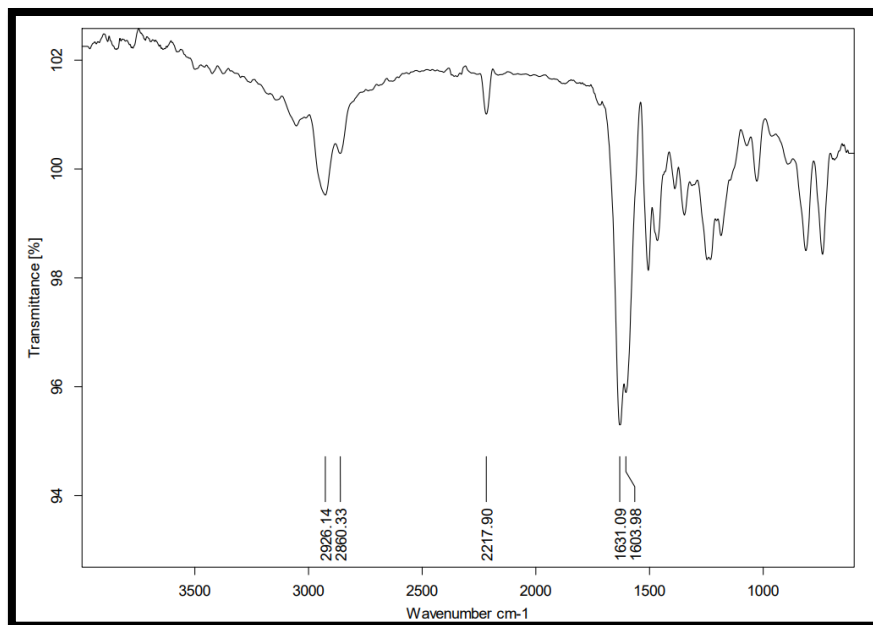

**Figure S5.** FTIR spectrum **Cz-CyP<sub>5</sub>**

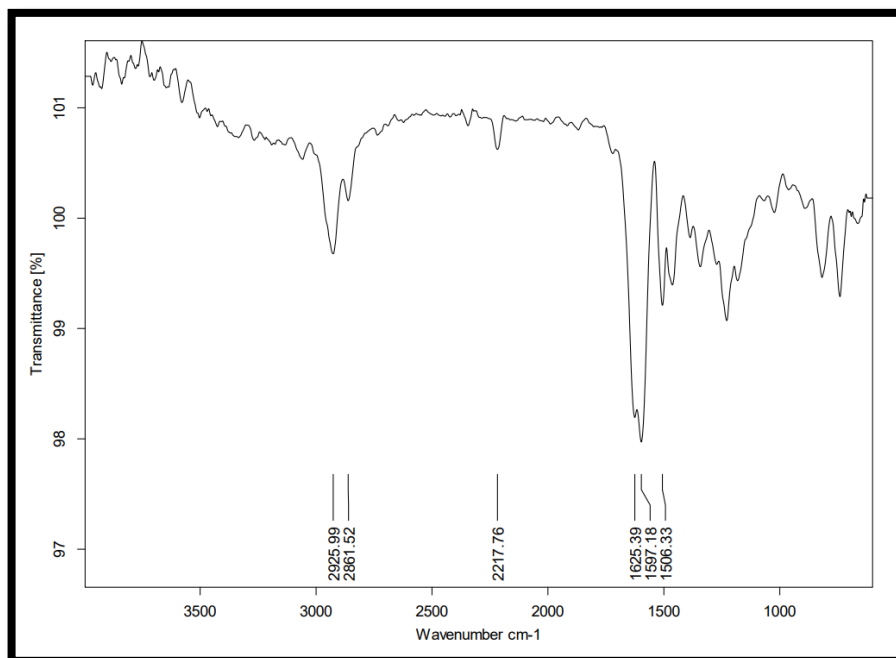

**Figure S6.** FTIR spectrum of **Cz-CyP<sub>6</sub>**

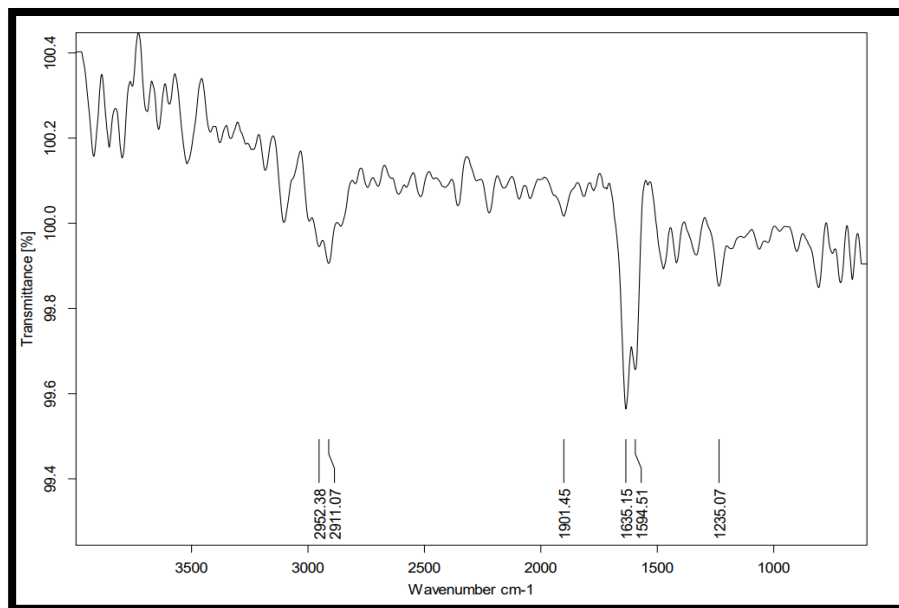

**Figure S7.** FTIR spectrum of Cz-CyP<sub>7</sub>

### <sup>1</sup>HNMR spectral characterization

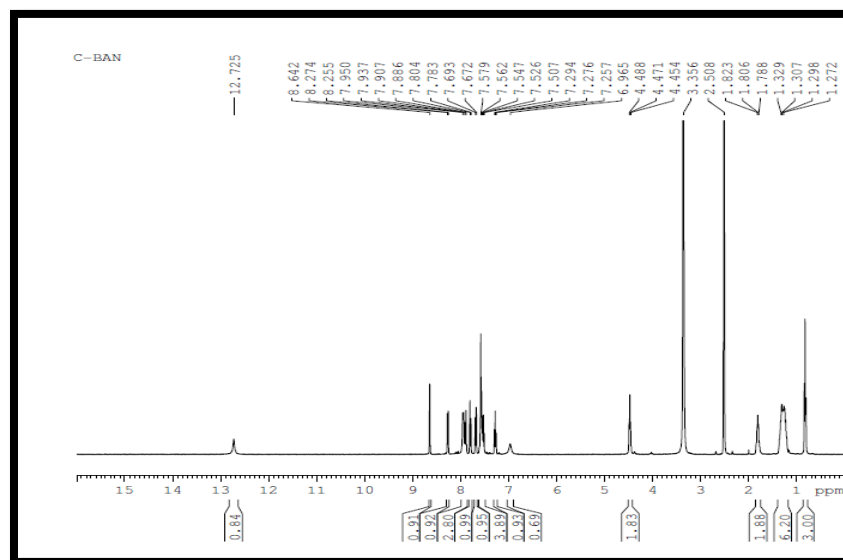

**Figure S8.** <sup>1</sup>H NMR spectrum of Cz-CyP<sub>1</sub>



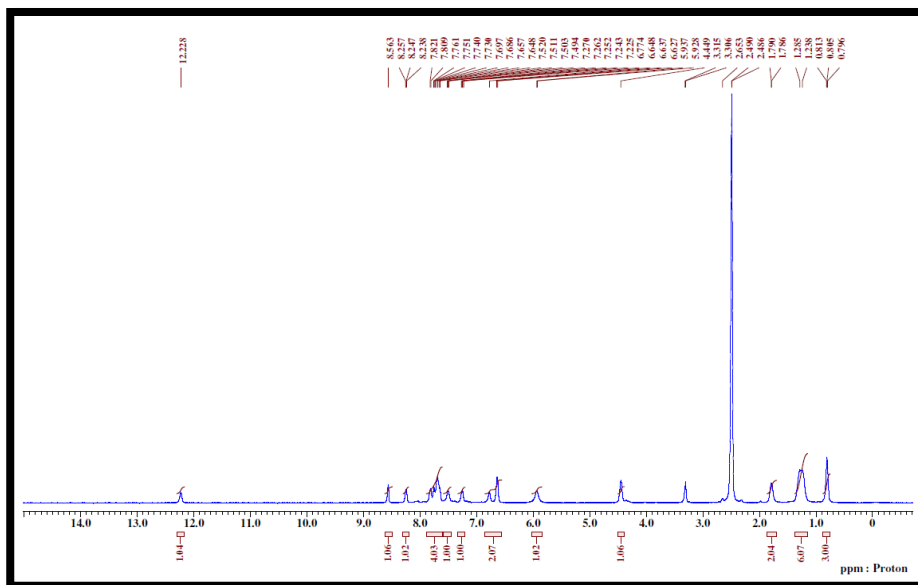

Figure S11. <sup>1</sup>H NMR spectrum of Cz-CyP<sub>4</sub>

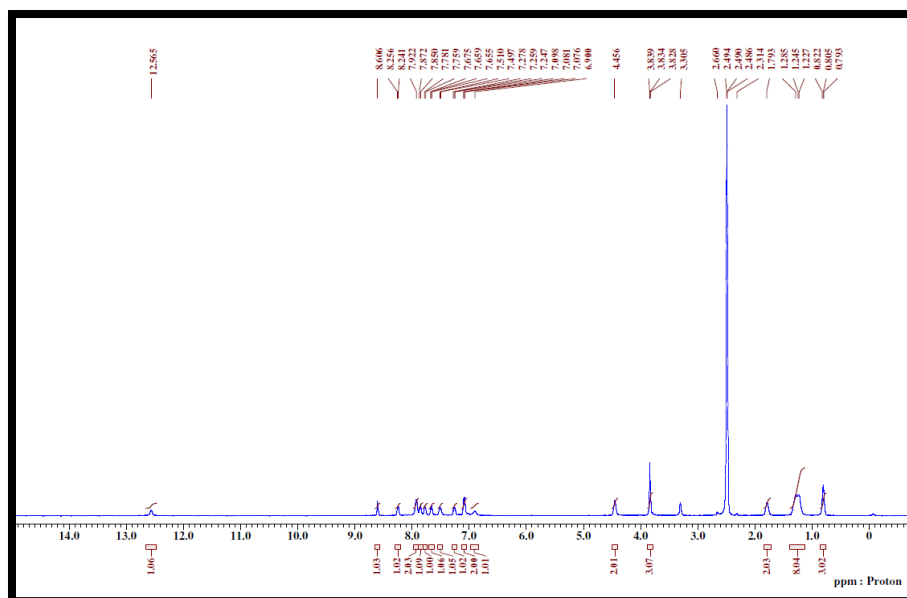

Figure S12. <sup>1</sup>H NMR spectrum of Cz-CyP<sub>5</sub>

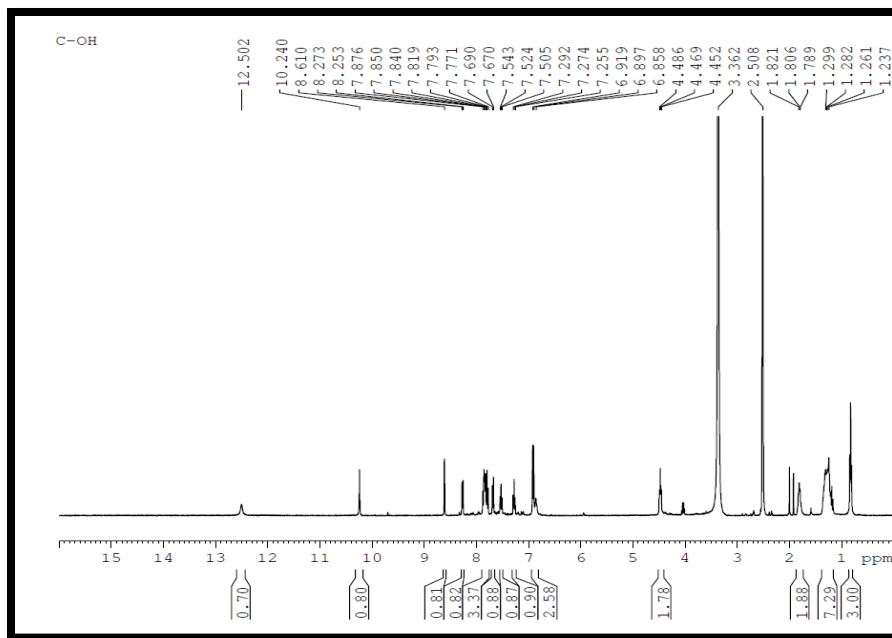

Figure S13.  $^1\text{H}$ NMR spectrum of Cz-CyP<sub>6</sub>

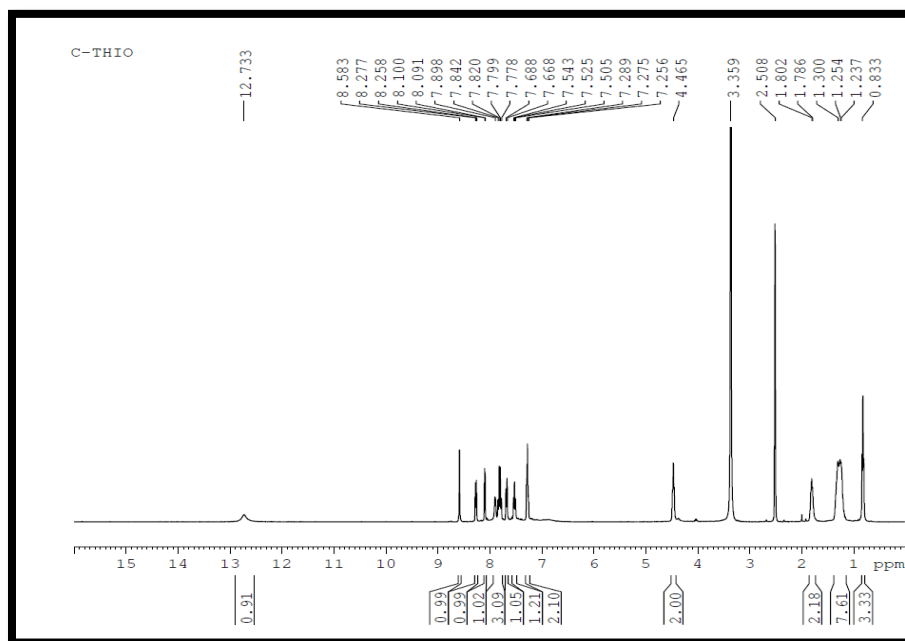

Figure S14.  $^1\text{H}$ NMR spectrum of Cz-CyP<sub>7</sub>



# $^{13}\text{C}$ NMR spectral characterization

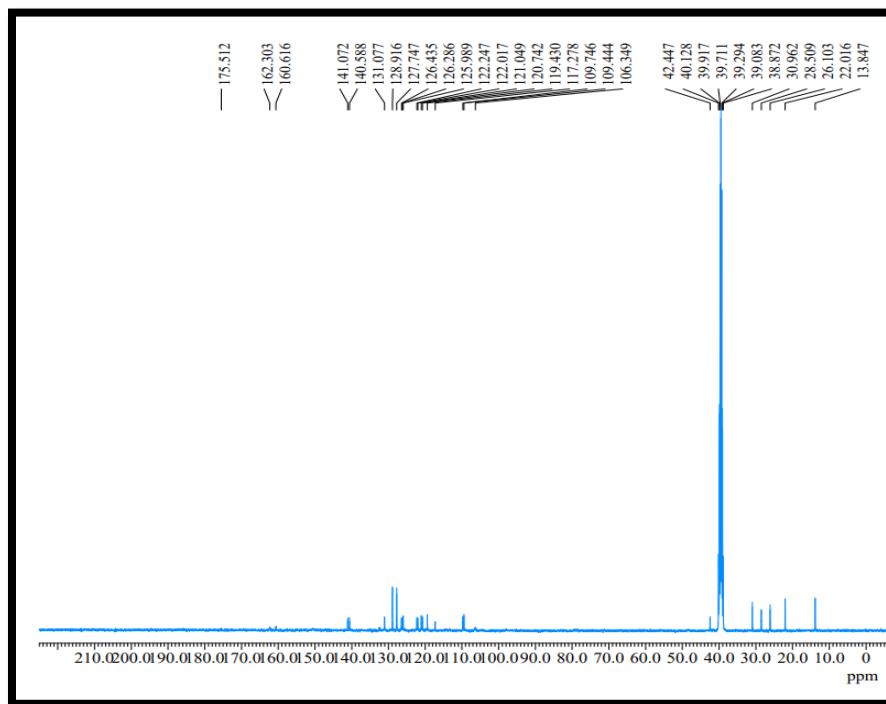

Figure S15.  $^{13}\text{C}$  NMR spectrum Cz-CyP<sub>1</sub>

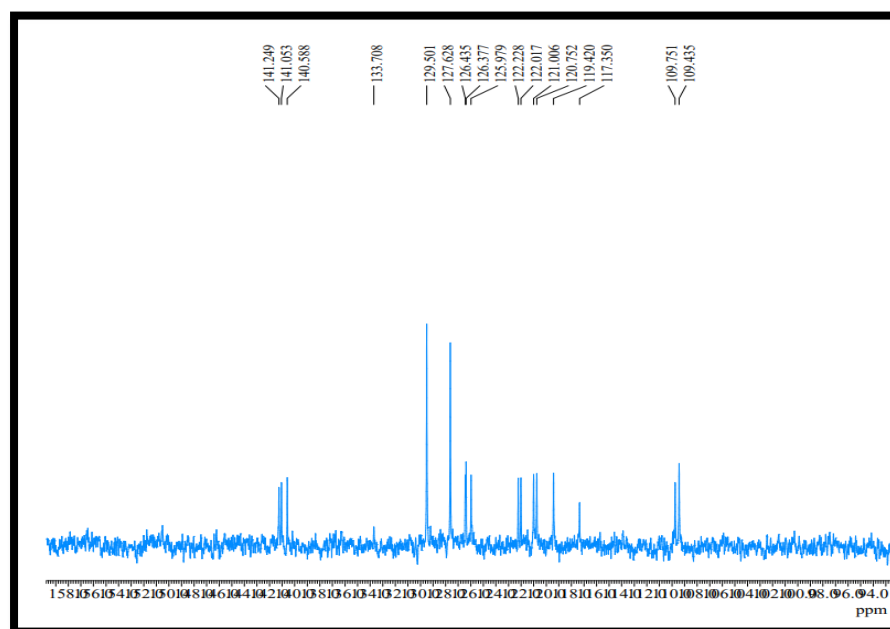

Figure S16.  $^{13}\text{C}$  NMR spectrum Cz-CyP<sub>2</sub>

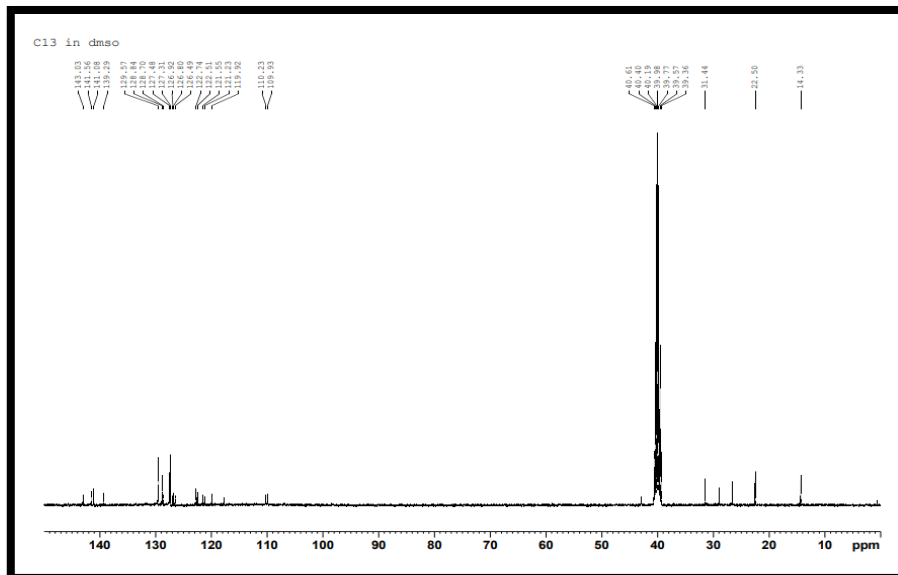

Figure S17.  $^{13}\text{C}$ NMR spectrum Cz-CyP<sub>3</sub>

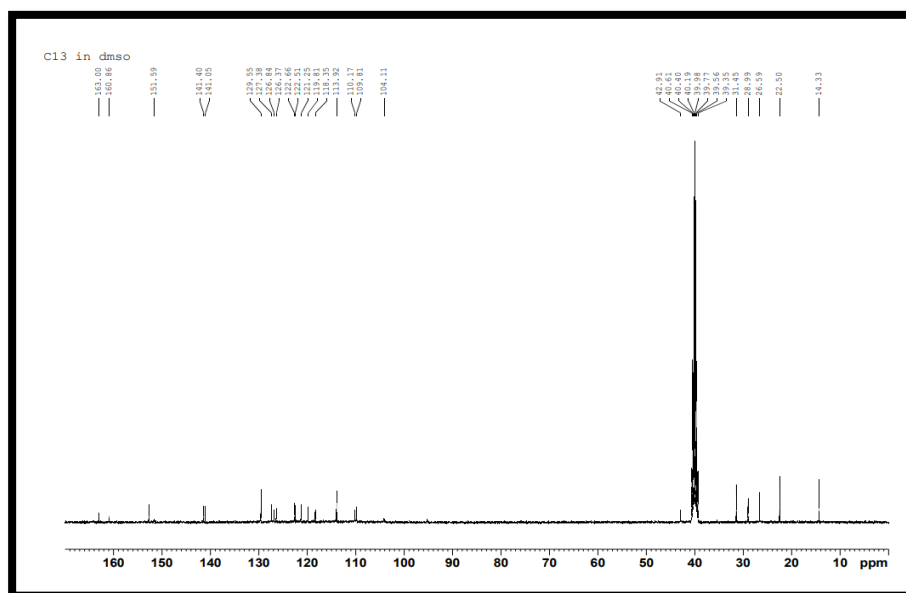

Figure S18  $^{13}\text{C}$ NMR spectrum Cz-CyP<sub>4</sub>

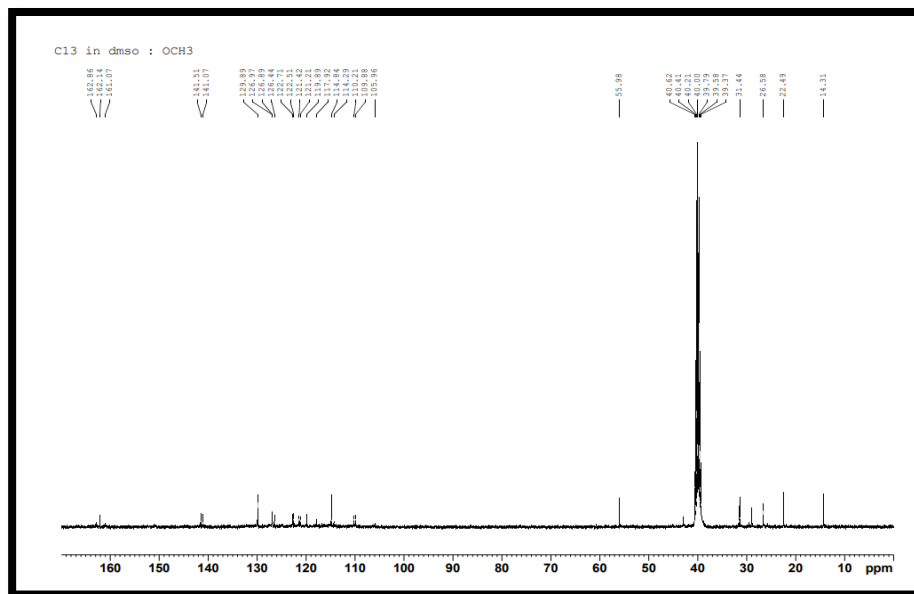

Figure S19.  $^{13}\text{C}$ NMR spectrum Cz-CyP<sub>5</sub>

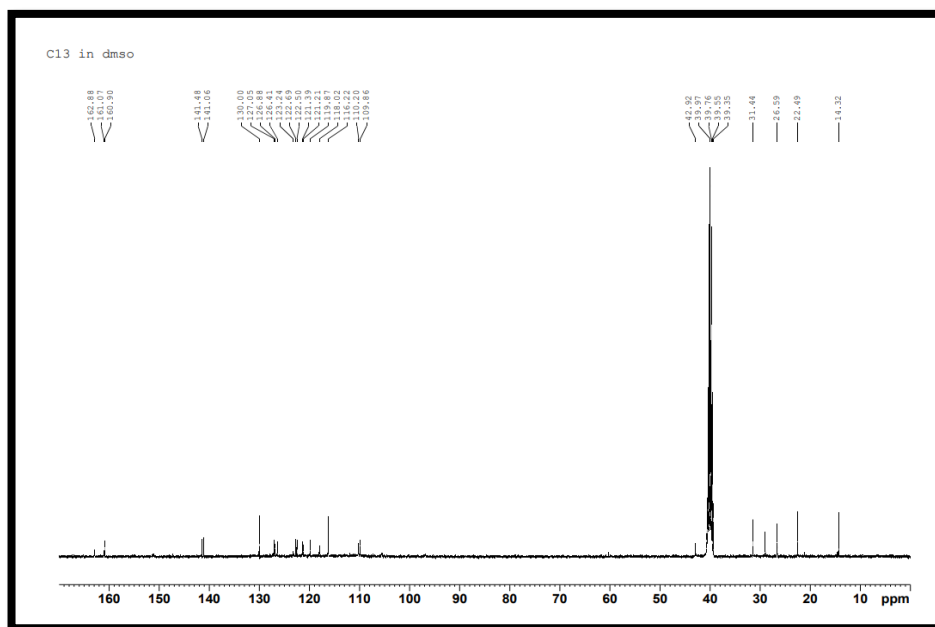

Figure S20.  $^{13}\text{C}$ NMR spectrum Cz-CyP<sub>6</sub>

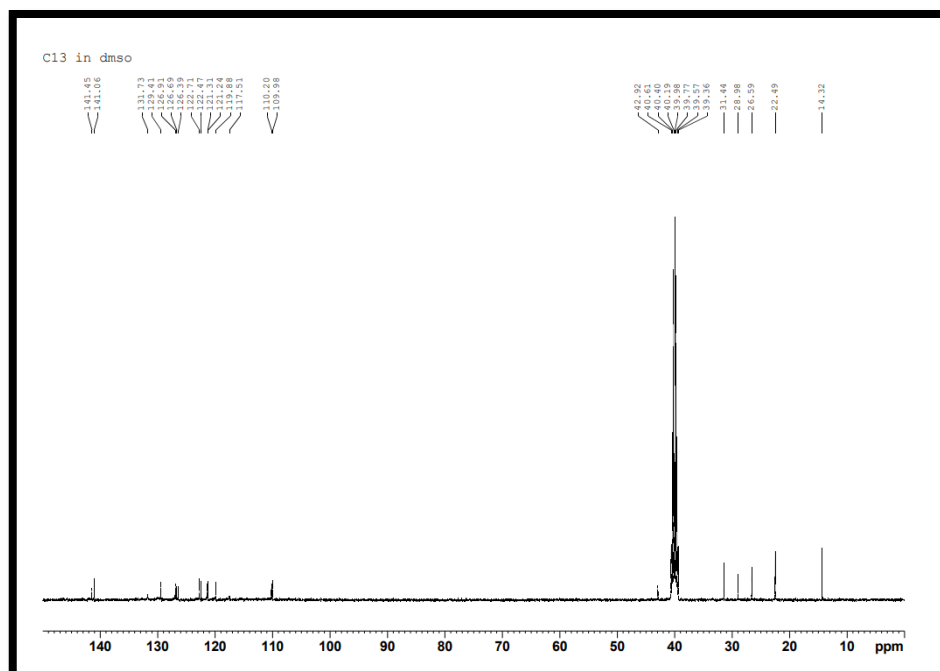

Figure S21.  $^{13}\text{C}$ NMR spectrum Cz-CyP<sub>7</sub>

### Mass spectral characterization

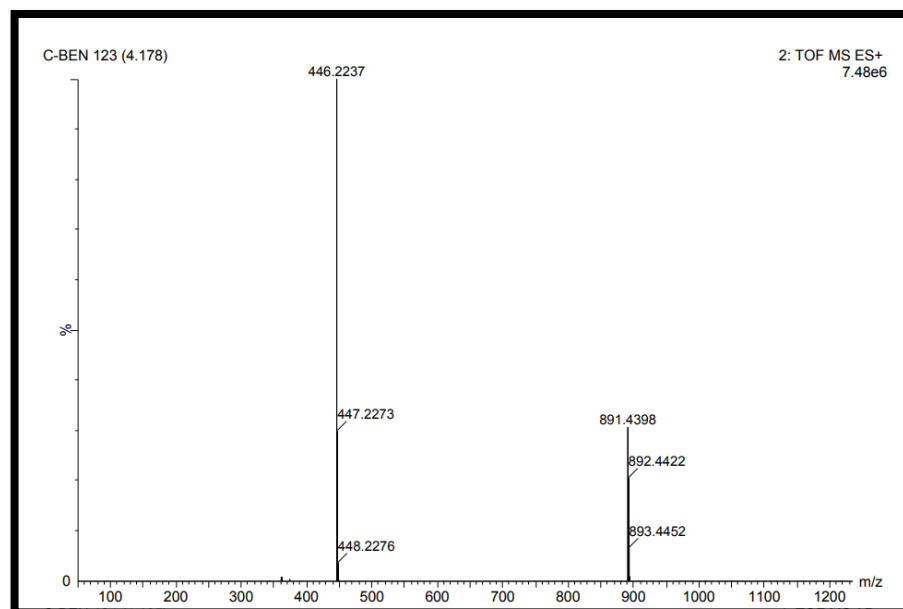

Figure S22. Mass spectrum of Cz-CyP<sub>1</sub>

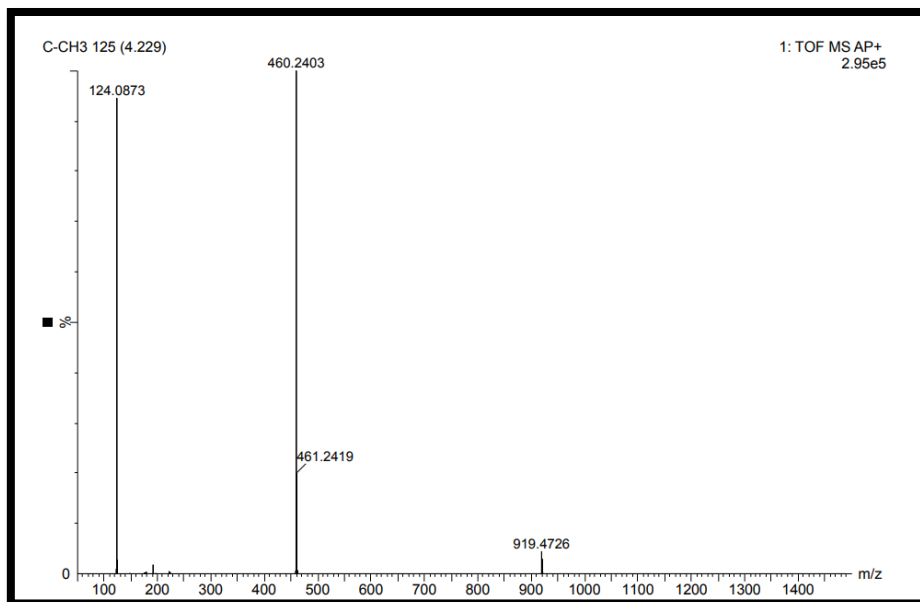

Figure S23. Mass spectrum of Cz-CyP<sub>2</sub>

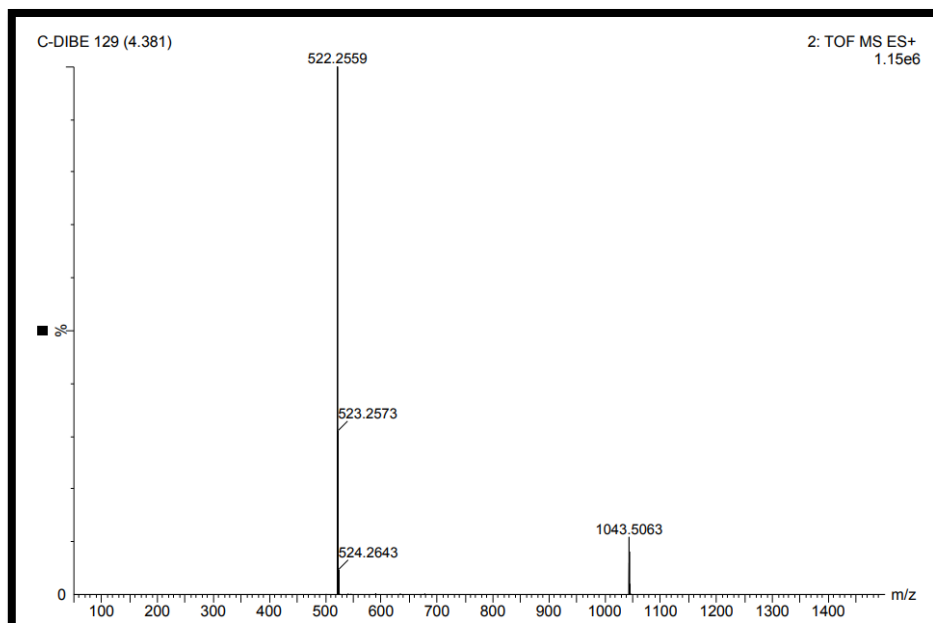

Figure S24. Mass spectrum of Cz-CyP<sub>3</sub>

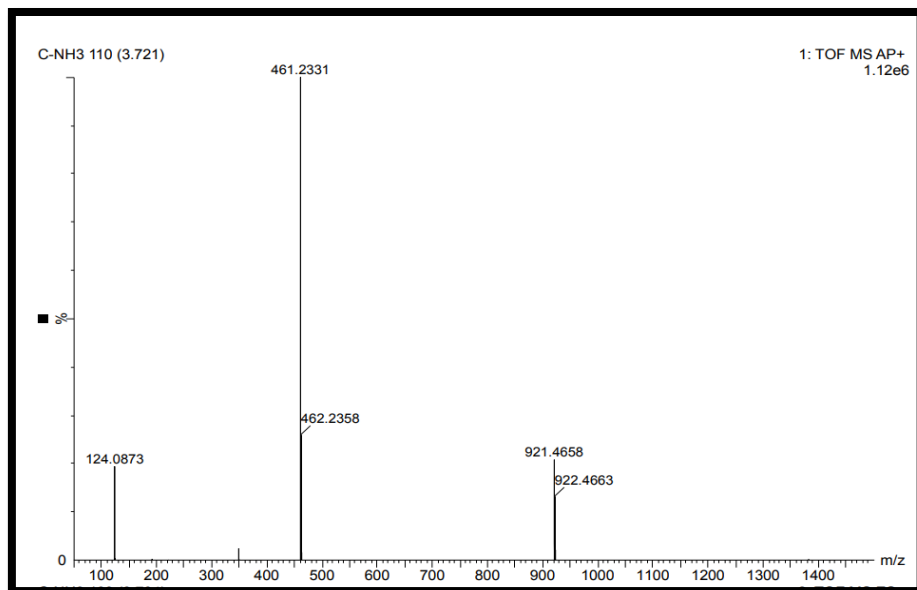

Figure S25. Mass spectrum of Cz-CyP<sub>4</sub>

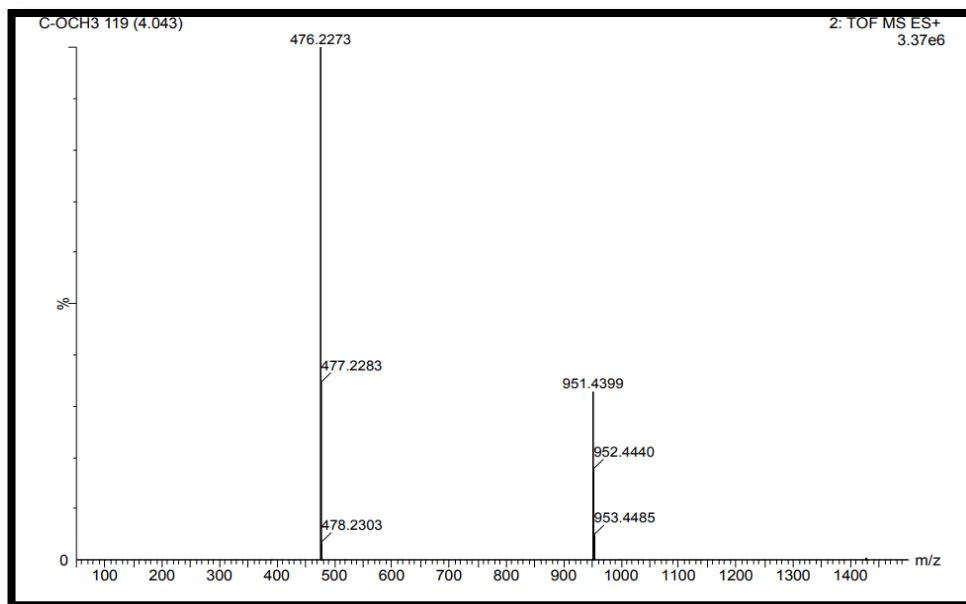

Figure S26. Mass spectrum of Cz-CyP<sub>5</sub>

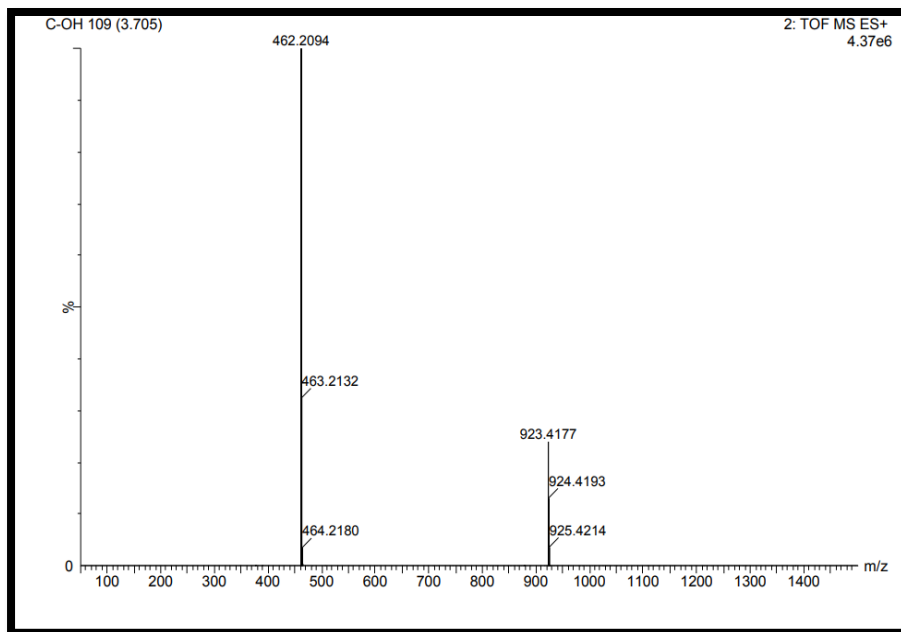

Figure S27. Mass spectrum of Cz-CyP<sub>6</sub>

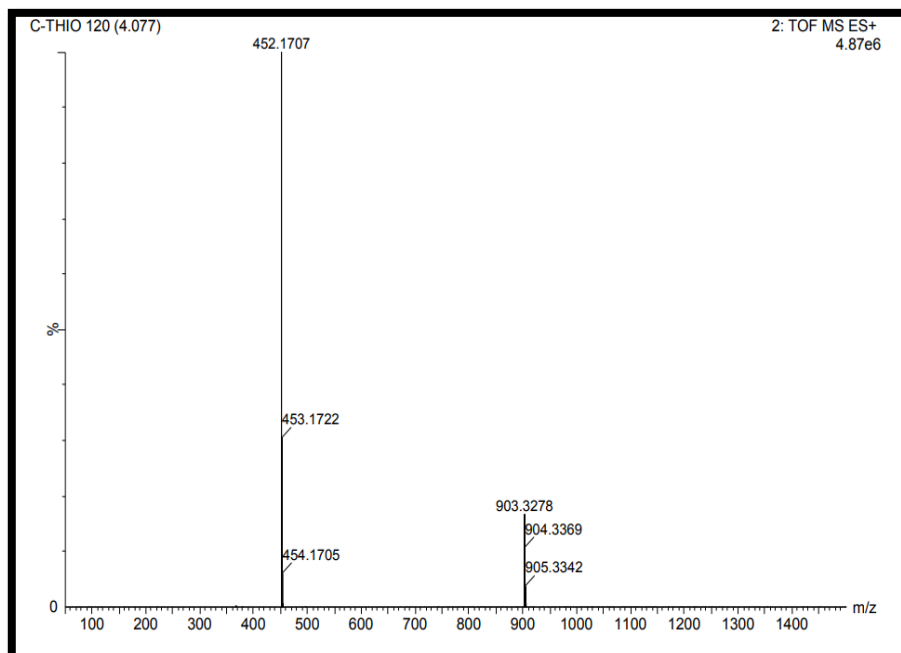

Figure S28. Mass spectrum of Cz-CyP<sub>7</sub>

## 2. Cyclic voltammograms of Cz-CyP<sub>1-7</sub>

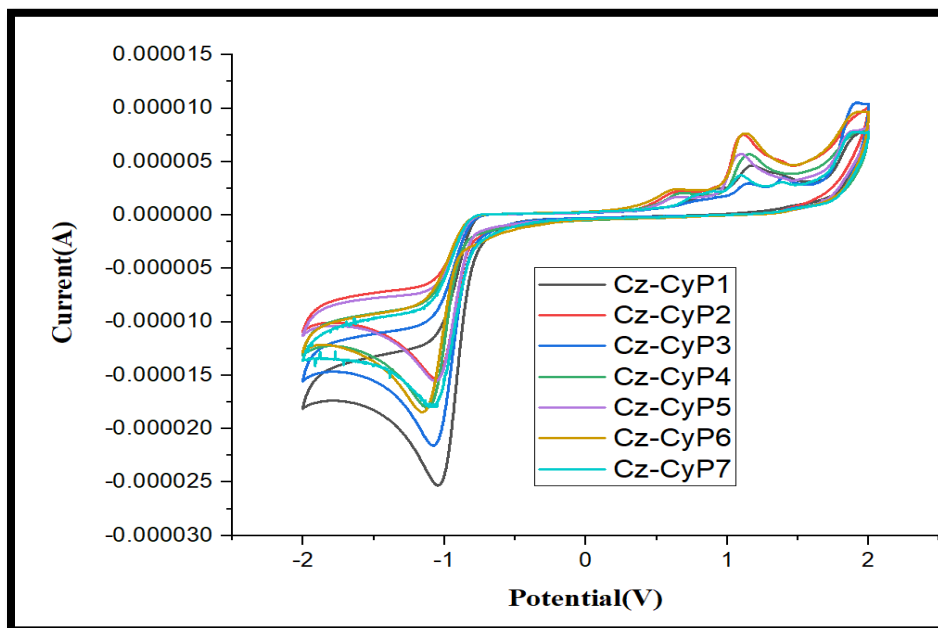

**Figure S29.** Cyclic voltammograms of Cz-CyP<sub>1-7</sub>



### 3. Solvatochromic behaviour

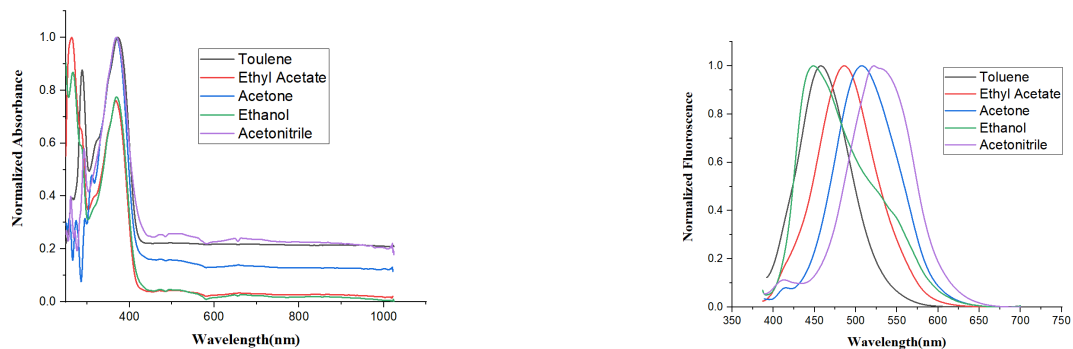

Figure S30. UV and PL spectra of Cz-CyP<sub>1</sub>

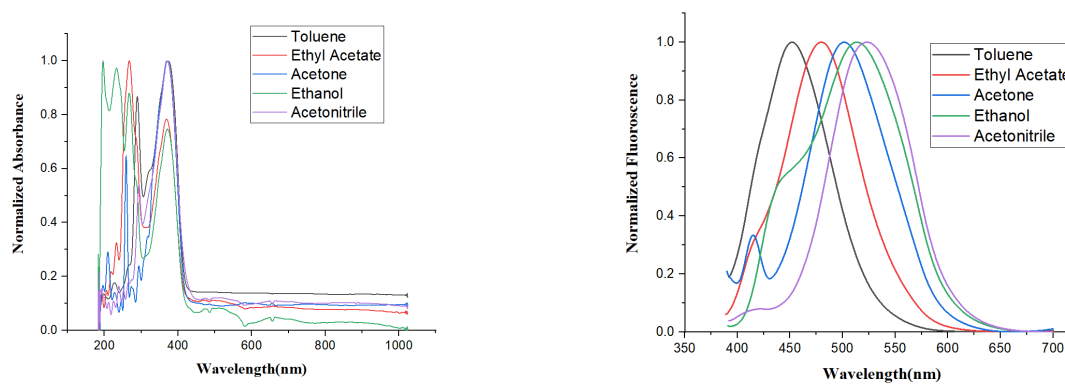

Figure S31. UV and PL spectra of Cz-CyP<sub>2</sub>

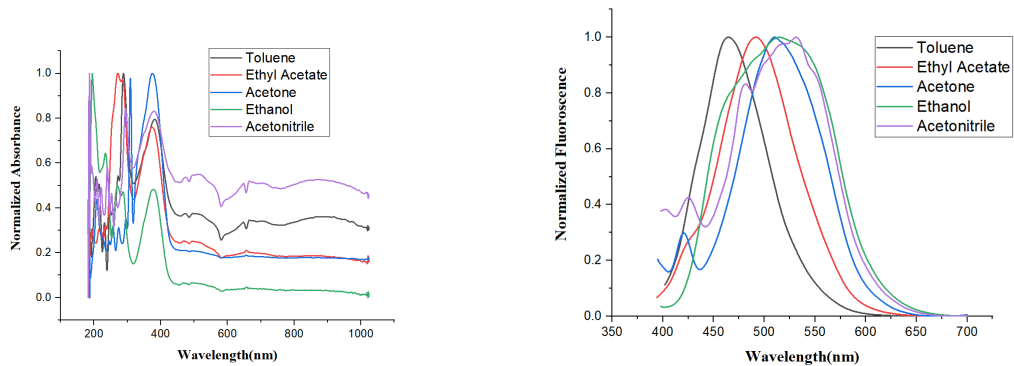

**Figure S32.** UV and PL spectra of Cz-CyP<sub>3</sub>

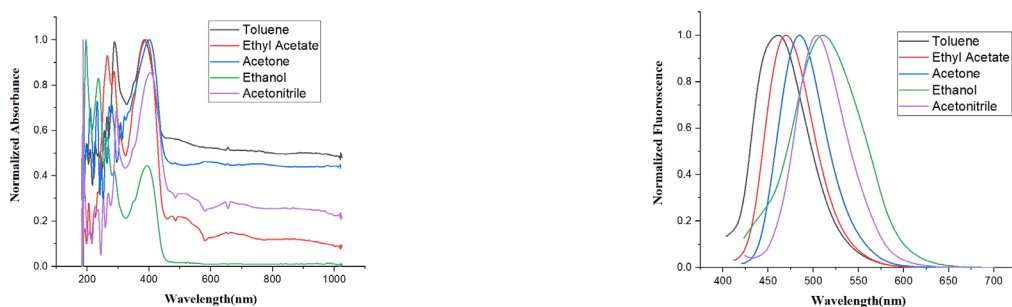

**Figure S33.** UV and PL spectra of Cz-CyP<sub>4</sub>

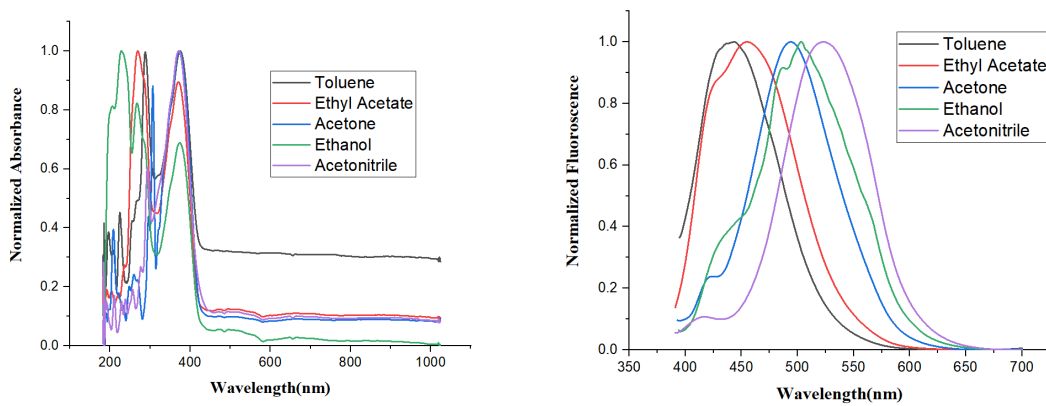

**Figure S34.** UV and PL spectra of Cz-CyP<sub>5</sub>

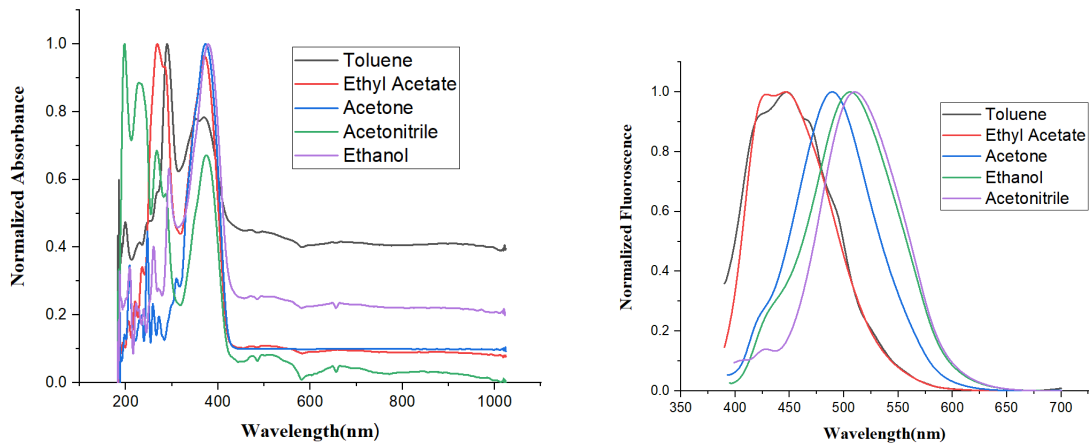

**Figure S35.** UV and PL spectra of Cz-CyP<sub>6</sub>

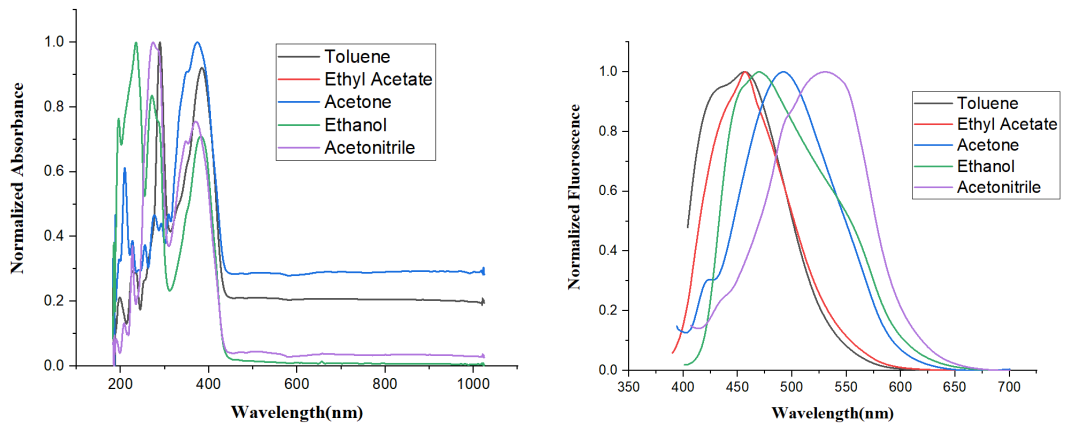

**Figure S36.** UV and PL spectra of Cz-CyP<sub>7</sub>

#### 4. Lippert-Mataga graphs

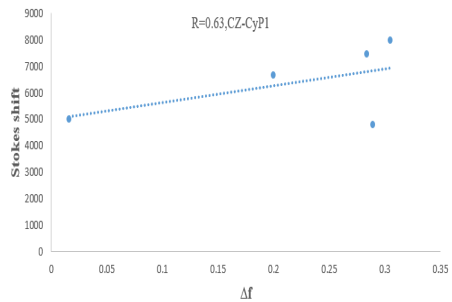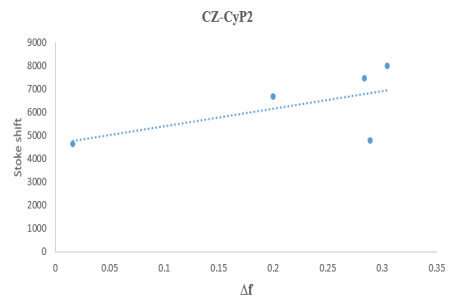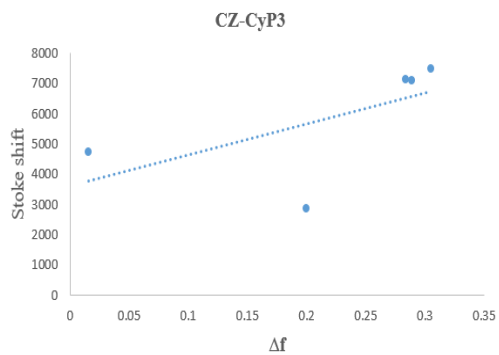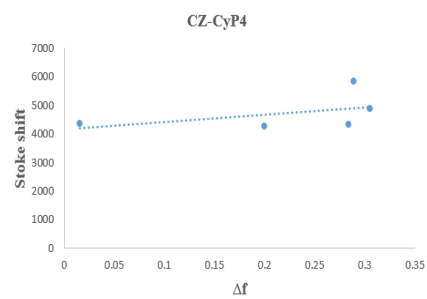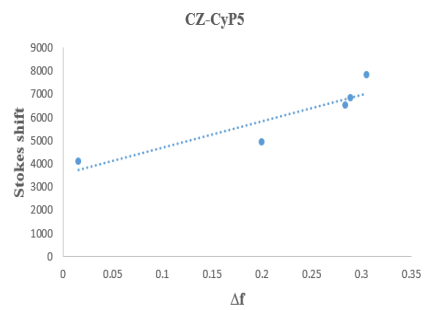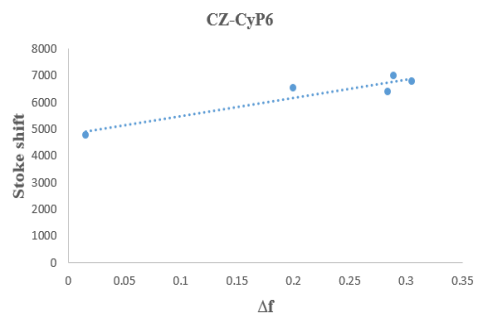

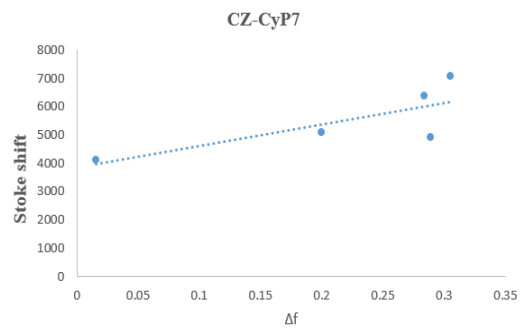

**Figure S37:** Lippert-Mataga plots for Cz-CyP<sub>1-7</sub>
